# Supplementary material for: Anaplastic lymphoma kinase-positive anaplastic large cell lymphoma with the variant RNF213-, ATIC- and TPM3-ALK fusions is characterized by copy number gain of the rearranged ALK gene
Source: PubMed Central journal article supplement — Haematologica. 2017 Sep;102(9):1605–16. doi: 10.3324/haematol.2016.146571 (PMC5685221; doi:10.3324/haematol.2016.146571), 2017-09
Supplement: 2016_146571-Disclosures_and_Contributions.pdf [file 2016_146571-Disclosures_and_Contributions.pdf]

Haematologica  
HAEMATOL/2016/146571  
Version 4

ALK-positive anaplastic large cell lymphoma with the variant RNF213-, ATIC- and TPM3-ALK fusions is characterized by copy number gain of the rearranged ALK gene

Jo-Anne van de Krogt, Marlies Vanden Bempt, Julio Finalet Ferreira, Nicole Mentens, Kris Jacobs, Ursula Pluys, Kathleen Doms, Ellen Geerdens, Anne Uyttebroeck, Pascal Pierre, Lucienne Michaux, Timothy Devos, Peter Vandenberghe, Thomas Tousseyn, Jan Cools, and Iwona Wlodarska

Disclosures: This study was supported by the concerted action grant from the K.U.Leuven no. 3M040406 (JAvdK, PV, TT, JC and IW) (<http://www.kuleuven.be/>), research grants from the FWO Vlaanderen (G081411N to TT) and 'Stichting tegen Kanker' (PV) (<http://www.kanker.be/>). MVDB holds a SB Fellowship of the Research Foundation-Flanders. PV is a senior clinical investigator of the FWO-Vlaanderen. TT holds a Mandate for Fundamental and Translational Research from the 'Stichting tegen Kanker' (2014-083)

Contributions: JAvdK, MVB: Design of the study, research, data analysis and interpretation, manuscript writing. JFF, KJ, UP, KD, EG, MVB, NM: research, data analysis and interpretation. AU, LM, TD, PV, PP: data collection, data interpretation, manuscript revision. TT: data collection, analysis and interpretation, manuscript revision. JC and IW. Concept and design of the study, research, data analysis and interpretation, manuscript writing
